# Supplementary material for: Impact of Coronavirus-19 Pandemic and Lockdown on Admissions for Ischemic Heart Disease
Source: PubMed Central journal article supplement (PMC10035782; doi:10.26502/fccm.92920270), 2022-07-07
Supplement: NIHMS1880234-supplement-1.pdf [file NIHMS1880234-supplement-1.pdf]

## Supplementary Files:

|                     | STEMI |      |         | NSTEMI |      |         | Unstable angina |      |         | Significance (p) |
|---------------------|-------|------|---------|--------|------|---------|-----------------|------|---------|------------------|
|                     | 18-19 | LD   | Post-LD | 18-19  | LD   | Post-LD | 18-19           | LD   | Post-LD |                  |
| Age (years)         | 64.1  | 66.8 | 64.4    | 71.9   | 76.2 | 70.3    | 68.6            | 71.5 | 67      | <0.05            |
| AHT (%)             | 56.6  | 69.2 | 60      | 76.6   | 66.7 | 71.9    | 79.9            | 66.7 | 77.7    | <0.05            |
| DM (%)              | 35.2  | 53.8 | 36.9    | 51.3   | 47.6 | 46.1    | 42.1            | 66.7 | 51.8    | <0.05            |
| DLP (%)             | 47.7  | 38.5 | 46.2    | 60.9   | 66.7 | 57.8    | 60.2            | 66.7 | 68.8    | <0.05            |
| IHD (%)             | 19.4  | 15.4 | 20      | 39.6   | 33.3 | 39.8    | 52.1            | 25   | 51.8    | <0.05            |
| CKD (%)             | 8.2   | 23.1 | 10.2    | 32.3   | 47.6 | 19      | 26.2            | 18.2 | 20      | <0.05            |
| AHT + DM (%)        | 27.2  | 53.8 | 29.2    | 46.4   | 42.9 | 39.8    | 38.3            | 50   | 46.4    | <0.05            |
| AHT + DLP (%)       | 28.5  | 23.1 | 29.2    | 50.8   | 47.6 | 50      | 52.9            | 50   | 62.5    | <0.05            |
| AHT + IHD (%)       | 13.9  | 15.4 | 18.5    | 33.5   | 23.8 | 35.9    | 44.7            | 25   | 41.1    | <0.05            |
| DM + DLP (%)        | 21.1  | 23.1 | 26.2    | 36.1   | 42.9 | 35.9    | 31.4            | 58.3 | 41.1    | <0.05            |
| DM + IHD (%)        | 9.1   | 15.4 | 13.8    | 27.6   | 14.3 | 22.7    | 27.4            | 16.7 | 31.3    | <0.05            |
| DLP + IHD (%)       | 14    | 15.4 | 10.8    | 32.9   | 23.8 | 32.8    | 37.2            | 25   | 41.1    | <0.05            |
| AHT + DM + DLP (%)  | 15.1  | 23.1 | 20      | 33     | 38.1 | 34.4    | 29.5            | 41.7 | 39.3    | <0.05            |
| AHT + DM + IHD (%)  | 8.5   | 15.4 | 12.3    | 25.4   | 14.3 | 21.9    | 25.1            | 16.7 | 28.6    | <0.05            |
| AHT + DLP + IHD (%) | 10.5  | 15.4 | 9.2     | 28.3   | 19   | 30.5    | 33.7            | 25   | 36.6    | <0.05            |
| DM + DLP + IHD (%)  | 6.8   | 15.4 | 10.8    | 22.5   | 14.3 | 21.1    | 21.3            | 16.7 | 26.8    | <0.05            |
| AHT + DM + DLP +    | 6.1   | 15.4 | 9.2     | 20.9   | 14.3 | 21.1    | 20.3            | 16.7 | 25.9    | <0.05            |

|         |  |   |  |   |  |   |  |
|---------|--|---|--|---|--|---|--|
| IHD (%) |  | 4 |  | 3 |  | 7 |  |
|---------|--|---|--|---|--|---|--|

**Table 1:** Baseline clinical characteristics. Values are expressed as a percentage or mean ± standard deviation. AHT: Arterial Hypertension; CKD: Chronic Kidney Disease; DLP: Dyslipidemia; DM: Diabetes Mellitus; IHD: Ischemic Heart Disease; LD: Lockdown; NS: Nonsignificant.

| A                             | PreCOVID (n=1,301) |        |     | Lockdown (n=45) |        |    | Postlockdown (n=343) |        |     | Significance (p) |
|-------------------------------|--------------------|--------|-----|-----------------|--------|----|----------------------|--------|-----|------------------|
|                               | STEMI              | NSTEMI | UA  | STEMI           | NSTEMI | UA | STEMI                | NSTEMI | UA  |                  |
| Cardiology                    | 0.2                | 0.9    | 0.4 | 0               | 0      | 0  | 0                    | 0.4    | 0.4 | <0.05            |
| ICU                           | 4.2                | 0.3    | 0.1 | 37.5            | 12.5   | 0  | 0                    | 0      | 0   | <0.05            |
| IM                            | 7.2                | 14.5   | 5.8 | 9.1             | 27.3   | 0  | 3.8                  | 11.5   | 1   | <0.05            |
| B                             | PreCOVID (n=1,301) |        |     | Lockdown (n=45) |        |    | Postlockdown (n=343) |        |     | Significance (p) |
| All-cause mortality (%)       | 11.7               |        |     | 15.4            |        |    | 5.6                  |        |     |                  |
| All-cause mortality (%/year)  | 6.3                |        |     | 18.1            |        |    | 7.3                  |        |     | <0.05            |
| Cardiovascular death (%)      | 3.5                |        |     | 7.7             |        |    | 1.5                  |        |     | <0.05            |
| Cardiovascular death (%/year) | 1.9                |        |     | 9               |        |    | 1.9                  |        |     | <0.05            |

**Table 2:** Mortality rates A) During admission by department and type of ACS B) Postdischarge mortality. Data are expressed as percentages. STEMI, ST-Segment Elevation Myocardial Infarction; NSTEMI, Non-ST-Segment Elevation Myocardial Infarction; UA, Unstable Angina; ICU, Intensive Care Unit; IM, Internal Medicine.

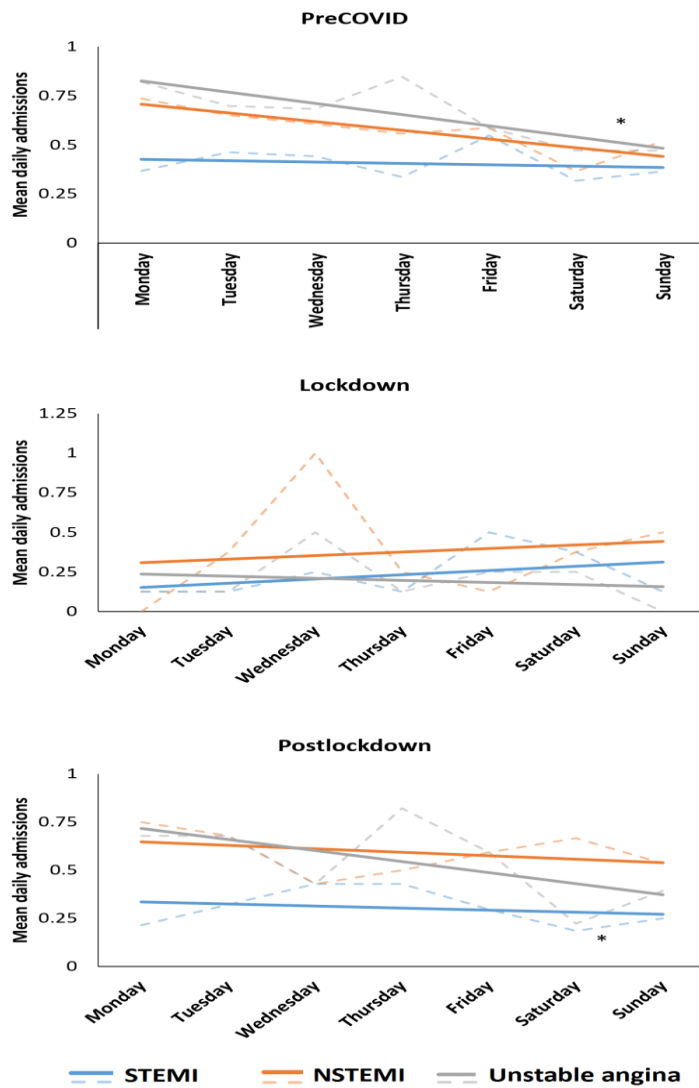

**Figure 1:** Daily admissions for ischemic heart disease. Weekly profile of admissions for the different types of ACS. \*p<0.05 weekends vs. weekdays. STEMI, ST - Segment Elevation Myocardial Infarction; NSTEMI, non-ST-Segment Myocardial Infarction.

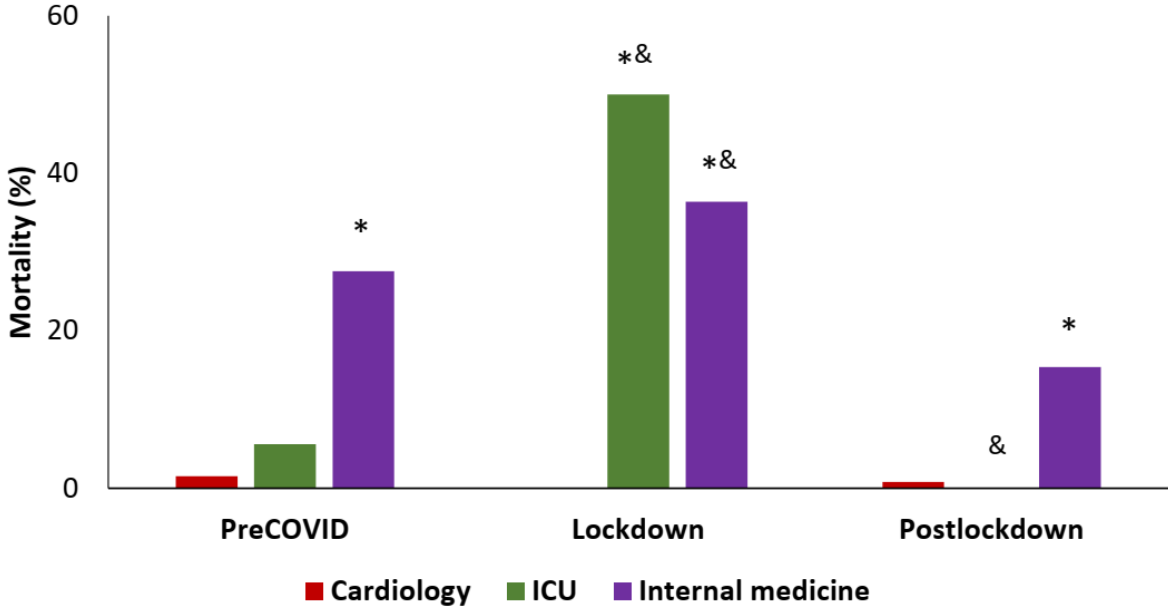

**Figure 2:** In-hospital mortality by department. \*p<0.05 vs. other departments for the same period. &p<0.05 vs. same department for other periods. ICU: Intensive Care Unit.
